# Supplementary material for: Vacuum ultraviolet photochemistry of sulfuric acid vapor: a combined experimental and theoretical study
Source: Royal Society of Chemistry journal article supplement (doi:10.1039/d1cp05237c), 2021-12-21
Supplement: d1cp05237c1.pdf [file d1cp05237c1.pdf]

## Supporting Information

### Vacuum ultraviolet photochemistry of sulfuric acid vapor: A combined experimental and theoretical study

Cuihong Zhang,<sup>†a,b,c</sup> Xiaoxiao Lin,<sup>†a</sup> Xiaofeng Tang,<sup>\*a</sup> Christa Fittschen,<sup>c</sup> Sebastian Hartweg,<sup>d</sup> Gustavo A. Garcia,<sup>\*d</sup> Bo Long,<sup>c</sup> Weijun Zhang,<sup>a</sup> and Laurent Nahon<sup>d</sup>

Table S1. Relative isotopic distribution in the photoionization mass spectra of Figure 1 and their assignments.

| Group | Mass | Relative intensity (%) |                         | Species                                |
|-------|------|------------------------|-------------------------|----------------------------------------|
|       |      | Experimental           | Literature <sup>a</sup> |                                        |
| 1     | 64   | 100                    | 100                     | $^{32}\text{SO}_2^+$                   |
|       | 65   | 2                      | 0.88                    | $^{33}\text{SO}_2^+$                   |
|       | 66   | 6                      | 4.9                     | $^{34}\text{SO}_2^+$                   |
| 2     | 80   | 100                    | 100                     | $^{32}\text{SO}_3^+$                   |
|       | 81   | 28                     | 0.91                    | $\text{H}^{32}\text{SO}_3^+$           |
|       | 82   | 5                      | 5.1                     | $^{34}\text{SO}_3^+$                   |
| 3     | 98   | 100                    | 100                     | $\text{H}_2^{32}\text{SO}_4^+$         |
|       | 99   | 65                     | 0.98                    | $\text{H}_2^{32}\text{SO}_4\text{H}^+$ |
|       | 100  | 8                      | 5.3                     | $\text{H}_2^{34}\text{SO}_4^+$         |

a. *J. Anal. At. Spectrom.*, 1999, 14, 5N-24N; Molecular Weight Calculator version 3, [www.wsearch.com.au](http://www.wsearch.com.au).

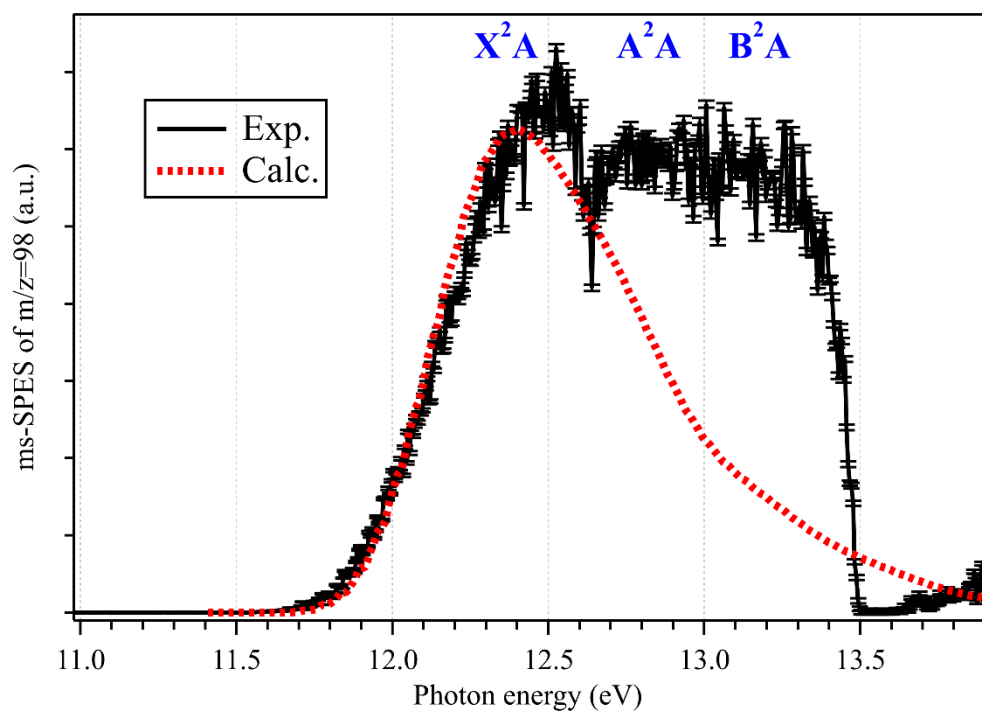

Figure S1. Slow photoelectron spectrum of  $\text{H}_2\text{SO}_4$  (in black) and the calculated photoelectron spectrum corresponding to the  $X^2A$  ground electronic state of  $\text{H}_2\text{SO}_4^+$  (in red).
